# Supplementary material
Source: publisher site journal article supplement (https://www.dovepress.com/article/441120)
Supplement: Supplementary file 1 [file get_supplementary_file.php]

## Supplementary Material

**sTable1: The interactions of Hub gene and targeted drug**

| search_term | match_term | match_type | gene  | drug          | interaction_types | sources                 | pmids    |
|-------------|------------|------------|-------|---------------|-------------------|-------------------------|----------|
| CXCL8       | CXCL8      | Definite   | CXCL8 | ABX-IL8       | inhibitor         | ChEMBL interactions TTD |          |
| CXCL8       | CXCL8      | Definite   | CXCL8 | HUMAX-IL8     | inhibitor         | ChEMBL interactions     |          |
| CXCL8       | CXCL8      | Definite   | CXCL8 | LEFLUNOMIDE   |                   | NCI                     | 10902750 |
| CXCL8       | CXCL8      | Definite   | CXCL8 | YANGONIN      |                   | DTC                     |          |
| CXCL8       | CXCL8      | Definite   | CXCL8 | E319          |                   | DTC                     |          |
| CXCL8       | CXCL8      | Definite   | CXCL8 | FOSCARNET     |                   | NCI                     | 10630964 |
| CXCL8       | CXCL8      | Definite   | CXCL8 | NAPROXEN      |                   | NCI                     | 11852880 |
| CXCL8       | CXCL8      | Definite   | CXCL8 | ALDRIN        |                   | DTC                     |          |
| CXCL8       | CXCL8      | Definite   | CXCL8 | COLCHICINE    |                   | DTC                     |          |
| CXCL8       | CXCL8      | Definite   | CXCL8 | MIDAZOLAM     |                   | NCI                     | 9620522  |
| CXCL8       | CXCL8      | Definite   | CXCL8 | FENTANYL      |                   | NCI                     | 9527747  |
| CXCL8       | CXCL8      | Definite   | CXCL8 | ACETAMINOPHEN |                   | NCI                     | 15878691 |
| CXCL8       | CXCL8      | Definite   | CXCL8 | CORONOPILIN   |                   | DTC                     |          |
| CXCL8       | CXCL8      | Definite   | CXCL8 | DIPYRIDAMOLE  |                   | NCI                     | 10660968 |
| CXCL8       | CXCL8      | Definite   | CXCL8 | IBUPROFEN     |                   | TTD                     |          |
| CXCL8       | CXCL8      | Definite   | CXCL8 | IONOMYCIN     |                   | NCI                     | 7510691  |
| CXCL8       | CXCL8      | Definite   | CXCL8 | CHLORDANE     |                   | DTC                     |          |

|       |       |          |       |                               |              |              |
|-------|-------|----------|-------|-------------------------------|--------------|--------------|
| CXCL8 | CXCL8 | Definite | CXCL8 | DANAZ<br>OL                   | NCI          | 1616145<br>1 |
| CXCL8 | CXCL8 | Definite | CXCL8 | CHEMB<br>L190207<br>4         | DTC          |              |
| CXCL8 | CXCL8 | Definite | CXCL8 | OMEPR<br>AZOLE<br>DINITR<br>O | NCI          | 1712296<br>5 |
| CXCL8 | CXCL8 | Definite | CXCL8 | CRESO<br>L                    | DTC          |              |
| CXCL8 | CXCL8 | Definite | CXCL8 | QUESTI<br>OMYCI<br>N B        | DTC          |              |
| CXCL8 | CXCL8 | Definite | CXCL8 | FENRET<br>INIDE               | NCI          | 1697911<br>9 |
| CXCL8 | CXCL8 | Definite | CXCL8 | HEPTA<br>CHLOR                | DTC          |              |
| CXCL8 | CXCL8 | Definite | CXCL8 | PYROG<br>ALLOL                | DTC          |              |
| CXCL8 | CXCL8 | Definite | CXCL8 | CANER<br>TINIB                | NCI          | 1595625<br>1 |
| CXCL8 | CXCL8 | Definite | CXCL8 | HYDRO<br>QUINO<br>NE          | DTC NC<br>I  | 1711862<br>2 |
| CXCL8 | CXCL8 | Definite | CXCL8 | ENDOS<br>ULFAN                | DTC          |              |
| CXCL8 | CXCL8 | Definite | CXCL8 | EMODI<br>N                    | DTC          |              |
| CXCL8 | CXCL8 | Definite | CXCL8 | LANSO<br>PRAZO<br>LE          | NCI          | 1712296<br>5 |
| CXCL8 | CXCL8 | Definite | CXCL8 | RETINA<br>L                   | DTC          |              |
| CXCL8 | CXCL8 | Definite | CXCL8 | HARMI<br>NE                   | DTC          |              |
| CXCL8 | CXCL8 | Definite | CXCL8 | HYDRO<br>CHLORI<br>DE         | DTC          |              |
| CXCL8 | CXCL8 | Definite | CXCL8 | PACLIT<br>AXEL                | NCI          | 9271387      |
| CXCL8 | CXCL8 | Definite | CXCL8 | BEVACI<br>ZUMAB               | PharmG<br>KB | 2358470<br>1 |

|       |       |          |       |                                          |              |                                        |
|-------|-------|----------|-------|------------------------------------------|--------------|----------------------------------------|
| CXCL8 | CXCL8 | Definite | CXCL8 | PAMID<br>RONIC<br>ACID                   | NCI          | 1200652<br>2                           |
| CXCL8 | CXCL8 | Definite | CXCL8 | TALC                                     | NCI          | 1700055<br>6                           |
| CXCL8 | CXCL8 | Definite | CXCL8 | TRETIN<br>OIN                            | NCI          | 8900181                                |
| CXCL8 | CXCL8 | Definite | CXCL8 | SUNITI<br>NIB                            | PharmG<br>KB | 2638781<br>2                           |
| CXCL8 | CXCL8 | Definite | CXCL8 | CETUXI<br>MAB                            | NCI          | 1061471<br>6 159086<br>64 10037<br>173 |
| CXCL8 | CXCL8 | Definite | CXCL8 | CHEMB<br>L157913<br>0                    | DTC          |                                        |
| CXCL8 | CXCL8 | Definite | CXCL8 | ALPRA<br>ZOLAM<br>METHI                  | NCI          | 1221815<br>4                           |
| CXCL8 | CXCL8 | Definite | CXCL8 | MAZOL<br>E                               | NCI          | 1145352<br>4                           |
| CXCL8 | CXCL8 | Definite | CXCL8 | RETINO<br>L                              | DTC          |                                        |
| CXCL8 | CXCL8 | Definite | CXCL8 | RIBAVI<br>RIN                            | DTC          |                                        |
| CXCL8 | CXCL8 | Definite | CXCL8 | TERFEN<br>ADINE                          | NCI          | 8919641                                |
| CXCL8 | CXCL8 | Definite | CXCL8 | DICYCL<br>OHEXY<br>LCARB<br>ODIIMI<br>DE | DTC          |                                        |
| CXCL8 | CXCL8 | Definite | CXCL8 | CEFTRI<br>AXONE                          | NCI          | 8011012                                |
| CXCL8 | CXCL8 | Definite | CXCL8 | ASPIRI<br>N                              | NCI          | 1257644<br>2                           |
| CXCL8 | CXCL8 | Definite | CXCL8 | CLARIT<br>HROMY<br>CIN                   | NCI          | 1200396<br>7                           |
| CXCL8 | CXCL8 | Definite | CXCL8 | DACAR<br>BAZINE                          | DTC          |                                        |
| CXCL8 | CXCL8 | Definite | CXCL8 | PENTO<br>XIFYLL<br>INE                   | NCI          | 1257644<br>2                           |

|       |       |              |       |                                   |                        |                                |                                        |
|-------|-------|--------------|-------|-----------------------------------|------------------------|--------------------------------|----------------------------------------|
| CXCL8 | CXCL8 | Definite     | CXCL8 | CIDOFO<br>VIR                     |                        | NCI                            | 1063096<br>4                           |
| CXCL8 | CXCL8 | Definite     | CXCL8 | BROXU<br>RIDINE                   |                        | DTC                            |                                        |
| CXCL8 | CXCL8 | Definite     | CXCL8 | TROGLI<br>TAZON<br>E              |                        | NCI                            | 1236445<br>6                           |
| CXCL8 | CXCL8 | Definite     | CXCL8 | DICHLO<br>RVOS                    |                        | DTC                            |                                        |
| CXCL8 | CXCL8 | Definite     | CXCL8 | VERAP<br>AMIL                     |                        | NCI                            | 2686646                                |
| MMP9  | MMP9  | Definite     | MMP9  | MARIM<br>ASTAT                    | inhibitor              | TdgClini<br>calTrial <br>TEND  | 1723418<br>0 127636<br>61 11752<br>352 |
| MMP9  | MMP9  | Definite     | MMP9  | PRINO<br>MASTA<br>T               | vaccine                | TALC                           |                                        |
| MMP9  | MMP9  | Definite     | MMP9  | ANDEC<br>ALIXIM<br>AB             | inhibitor <br>antibody | ChemblI<br>nteractio<br>ns TTD |                                        |
| MMP9  | MMP9  | Definite     | MMP9  | S-3304<br>CURCU<br>MIN            | vaccine                | TALC                           |                                        |
| MMP9  | MMP9  | Definite     | MMP9  | PYRAZ<br>OLE                      |                        | DTC                            | 1912897<br>7                           |
| MMP9  | MMP9  | Definite     | MMP9  | TOZUL<br>ERISTI<br>DE             |                        | TTD                            |                                        |
| MMP9  | MMP9  | Definite     | MMP9  | CURCU<br>MIN                      |                        | TTD                            |                                        |
| MMP9  | MMP9  | Definite     | MMP9  | INCYCL<br>INIDE                   |                        | TdgClini<br>calTrial           |                                        |
| MMP9  | MMP9  | Definit<br>e | MMP9  | BEVACI<br>ZUMAB<br>CARBO<br>XYLAT |                        | CIViC                          | 2692126<br>5                           |
| MMP9  | MMP9  | Definit<br>e | MMP9  | ED<br>GLUCO<br>SAMIN<br>E         |                        | DTC                            | 1661649<br>0                           |
| MMP9  | MMP9  | Definit<br>e | MMP9  | DEMET<br>HYLWE<br>DELOL           |                        | DTC                            | 2292622<br>6                           |

|       |       |          |       |                                                |           |                                                                      |                                                                                 |
|-------|-------|----------|-------|------------------------------------------------|-----------|----------------------------------------------------------------------|---------------------------------------------------------------------------------|
| MMP9  | MMP9  | Definite | MMP9  | ACTONE<br>CELECOXIB                            |           | PharmKB                                                              | 22336956<br>10567199 161973                                                     |
| PTGS2 | PTGS2 | Definite | PTGS2 | MELOXICAM                                      | inhibitor | PharmKB TdgClinicalTrial ChembII<br>nteractions TEND<br> PharmKB TTD | 63 10220944 11752352 10381787 10340919 10381057 30774225 19602986               |
| PTGS2 | PTGS2 | Definite | PTGS2 | NIMESULIDE                                     | inhibitor | PharmKB                                                              | 16846549 11752352                                                               |
| PTGS2 | PTGS2 | Definite | PTGS2 | MECLOFENAMATE<br>SODIUM<br>NAPROXEN<br>ETEMSIL | inhibitor | ChembII<br>nteractions                                               |                                                                                 |
| PTGS2 | PTGS2 | Definite | PTGS2 | IBUPROFEN                                      | inhibitor | ChembII<br>nteractions TEND<br> PharmKB TTD                          | 25502615 15481334 12852704 11752352 1556152 15494133 16678543 14510637 19602986 |
| PTGS2 | PTGS2 | Definite | PTGS2 | SUPROFEN                                       | inhibitor | TdgClinicalTrial ChembII<br>nteractions TEND                         | 11885959 17139284 10377455 17016423                                             |

|       |       |          |       |                                        |           |                                                       |                                                                                            |
|-------|-------|----------|-------|----------------------------------------|-----------|-------------------------------------------------------|--------------------------------------------------------------------------------------------|
| PTGS2 | PTGS2 | Definite | PTGS2 | PIROXICAM                              | inhibitor | TdgClinicalTrial ChEMBL Interactions                  | 1195215<br>5 117857<br>74 11153<br>163 1175<br>2352 154<br>64832 10<br>381057              |
| PTGS2 | PTGS2 | Definite | PTGS2 | OXYPHENBUTAZONE<br>BROMFENAC<br>SODIUM | inhibitor | ChEMBL Interactions                                   |                                                                                            |
| PTGS2 | PTGS2 | Definite | PTGS2 | IBUPROFEN<br>LYSINE                    | inhibitor | ChEMBL Interactions                                   |                                                                                            |
| PTGS2 | PTGS2 | Definite | PTGS2 | ETODOLAC                               | inhibitor | TdgClinicalTrial ChEMBL Interactions TEND PharmKB TTD | 1282491<br>8 110090<br>46 11275<br>997 1175<br>2352 105<br>94327 15<br>198222 1<br>9602986 |
| PTGS2 | PTGS2 | Definite | PTGS2 | AMINOSALICYLIC<br>POTASSIUM            | inhibitor | ChEMBL Interactions                                   |                                                                                            |
| PTGS2 | PTGS2 | Definite | PTGS2 | KETOROLAC                              | inhibitor | TdgClinicalTrial ChEMBL Interactions TEND TTD         | 1451371<br>8 117293<br>62 11752<br>352 1181<br>4865 151<br>98222 10<br>895904              |
| PTGS2 | PTGS2 | Definite | PTGS2 | NAPROXEN                               | inhibitor | TdgClinicalTrial ChEMBL Interactions                  |                                                                                            |
| PTGS2 | PTGS2 | Definite | PTGS2 | CELECOXIB                              | inhibitor | TALC TdgClinic                                        | 1209331<br>1 120862                                                                        |

|       |       |              |       |                                 |           |                                                                                                     |                                                                                      |
|-------|-------|--------------|-------|---------------------------------|-----------|-----------------------------------------------------------------------------------------------------|--------------------------------------------------------------------------------------|
|       |       |              |       |                                 |           | alTrial C<br>hemblInt<br>eractions <br>MyCanc<br>erGenom<br>eClinical<br>Trial Pha<br>rmGKB <br>TTD | 92 12055<br>598 1175<br>2352 120<br>86402 12<br>104042 2<br>2336956 <br>1960298<br>6 |
| PTGS2 | PTGS2 | Definit<br>e | PTGS2 | DICLOF<br>ENAC<br>SODIU<br>M    | inhibitor | ChemblI<br>nteractio<br>ns                                                                          |                                                                                      |
| PTGS2 | PTGS2 | Definit<br>e | PTGS2 | DIFLUN<br>ISAL                  | inhibitor | TdgClini<br>calTrial <br>ChemblI<br>nteractio<br>ns TEND<br> TTD                                    | 1131537<br>5 873774<br>8 128524<br>83 11673<br>972 1082<br>5891 117<br>52352         |
| PTGS2 | PTGS2 | Definit<br>e | PTGS2 | CARPR<br>OFEN                   | inhibitor | TdgClini<br>calTrial <br>ChemblI<br>nteractio<br>ns TEND<br> TTD                                    | 1593962<br>2 117523<br>52 17181<br>139 1170<br>3020 151<br>98222 10<br>895904        |
| PTGS2 | PTGS2 | Definit<br>e | PTGS2 | ACETA<br>MINOP<br>HEN           | inhibitor | TdgClini<br>calTrial <br>ChemblI<br>nteractio<br>ns TEND                                            | 1788497<br>4 173221<br>16 17175<br>104 1175<br>2352                                  |
| PTGS2 | PTGS2 | Definit<br>e | PTGS2 | FENOP<br>ROFEN<br>CALCIU<br>M   | inhibitor | ChemblI<br>nteractio<br>ns                                                                          |                                                                                      |
| PTGS2 | PTGS2 | Definit<br>e | PTGS2 | DICLOF<br>ENAC<br>EPOLA<br>MINE | inhibitor | ChemblI<br>nteractio<br>ns                                                                          |                                                                                      |
| PTGS2 | PTGS2 | Definit<br>e | PTGS2 | NS-398                          | inhibitor | DTC                                                                                                 | 2177515<br>2 191721<br>46 16480                                                      |

|       |       |          |       |                          |           |                                                      |                                                                                            |
|-------|-------|----------|-------|--------------------------|-----------|------------------------------------------------------|--------------------------------------------------------------------------------------------|
|       |       |          |       |                          |           |                                                      | 277 2545<br>3792<br>1256466<br>2 201437<br>79 15494                                        |
| PTGS2 | PTGS2 | Definite | PTGS2 | VALDE<br>COXIB           | inhibitor | DTC ChemblInteractions PharmKB TTD                   | 548 1071<br>5145 117<br>52352 12<br>644588 1<br>2167567 <br>1106083<br>3 196029<br>86      |
| PTGS2 | PTGS2 | Definite | PTGS2 | BROMF<br>ENAC            | inhibitor | TdgClinicalTrial TEND                                | 1698228<br>9 168465<br>46 12016<br>548                                                     |
| PTGS2 | PTGS2 | Definite | PTGS2 | OLSAL<br>AZINE<br>SODIUM | inhibitor | ChemblInteractions                                   |                                                                                            |
| PTGS2 | PTGS2 | Definite | PTGS2 | ETORIC<br>OXIB           | inhibitor | TdgClinicalTrial ChemblInteractions TEND PharmKB TTD | 1757312<br>8 171641<br>36 17691<br>997 1175<br>2352 171<br>39284 17<br>016423 1<br>9602986 |
| PTGS2 | PTGS2 | Definite | PTGS2 | BISMUTH<br>SUBSALICYLATE | inhibitor | ChemblInteractions                                   |                                                                                            |
| PTGS2 | PTGS2 | Definite | PTGS2 | NABUM<br>ETONE           | inhibitor | TdgClinicalTrial ChemblInteractions TEND TTD         | 1130469<br>9 120474<br>90 11153<br>163 1175<br>2352 154<br>56329 76<br>15202               |
| PTGS2 | PTGS2 | Definite | PTGS2 | FENOP<br>ROFEN           | inhibitor | TdgClinicalTrial TEND                                | 1705079<br>8                                                                               |



|       |       |          |       |                        |           |                                                   |                                                                                                                    |
|-------|-------|----------|-------|------------------------|-----------|---------------------------------------------------|--------------------------------------------------------------------------------------------------------------------|
| PTGS2 | PTGS2 | Definite | PTGS2 | NEPAFENAC              | inhibitor | TdgClinicalTrial ChemblInteractions TEND          | 10850857                                                                                                           |
| PTGS2 | PTGS2 | Definite | PTGS2 | DICLOFENAC             | inhibitor | TdgClinicalTrial ChemblInteractions TEND PharmGKB | 12705061 12925531 12588370 1252704 12534640 1960298614965322 15017615 14552704 15177307 11752352 15655513 19602986 |
| PTGS2 | PTGS2 | Definite | PTGS2 | LUMIRACOXIB            | inhibitor | TdgClinicalTrial TEND PharmGKB TTD                | 15 14552704 15177307 11752352 15655513 19602986                                                                    |
| PTGS2 | PTGS2 | Definite | PTGS2 | NAPROXEN SODIUM        | inhibitor | ChemblInteractions                                |                                                                                                                    |
| PTGS2 | PTGS2 | Definite | PTGS2 | KETOROLAC TROMETHAMINE | inhibitor | ChemblInteractions                                | 15668944 24697244 15730717 20684598 15831440 22818041 15770365 10381057 15667901 19602986                          |
| PTGS2 | PTGS2 | Definite | PTGS2 | INDOMETHACIN           | inhibitor | DTC ChemblInteractions TEND PharmGKB TTD          | 717 20684598 15831440 22818041 15770365 10381057 15667901 19602986                                                 |
| PTGS2 | PTGS2 | Definite | PTGS2 | TOLMETIN               | inhibitor | ChemblInteractions                                |                                                                                                                    |

|       |       |          |       |                                  |           |                                                  |                                                                   |
|-------|-------|----------|-------|----------------------------------|-----------|--------------------------------------------------|-------------------------------------------------------------------|
| PTGS2 | PTGS2 | Definite | PTGS2 | SODIUM<br>FLURBIPROFEN<br>SODIUM | inhibitor | ChEMBL<br>interactions                           |                                                                   |
| PTGS2 | PTGS2 | Definite | PTGS2 | OXAPROZIN<br>POTASSIUM           | inhibitor | ChEMBL<br>interactions                           |                                                                   |
| PTGS2 | PTGS2 | Definite | PTGS2 | ASPIRIN                          | inhibitor | ChEMBL<br>interactions TEND<br> CIViC PharmGKB   | 17522398                                                          |
| PTGS2 | PTGS2 | Definite | PTGS2 | KETOROLAC                        | inhibitor | TdgClinicalTrial <br>TEND                        | 09 14568<br>028 1456<br>8029 151<br>02535 12<br>110513<br>1933857 |
| PTGS2 | PTGS2 | Definite | PTGS2 | OXAPROZIN                        | inhibitor | TdgClinicalTrial <br>ChEMBL<br>interactions TEND | 9 983133<br>1 965085<br>2 199524<br>16 12065<br>695 1702<br>4689  |
| PTGS2 | PTGS2 | Definite | PTGS2 | MESALAMINE                       | inhibitor | TdgClinicalTrial <br>ChEMBL<br>interactions TEND | 1685517<br>8 124634<br>55 14742<br>690 1220<br>8114 925<br>6165   |
| PTGS2 | PTGS2 | Definite | PTGS2 | TOLMETIN                         | inhibitor | TdgClinicalTrial <br>TEND TD                     | 0 104656<br>90 92539<br>54 11752<br>352 1739<br>1279 154<br>58776 |

|       |       |          |       |               |           |                                                       |                                                                                                   |
|-------|-------|----------|-------|---------------|-----------|-------------------------------------------------------|---------------------------------------------------------------------------------------------------|
| PTGS2 | PTGS2 | Definite | PTGS2 | PARECOXIB     | inhibitor | TdgClinicalTrial                                      | 10794682                                                                                          |
| PTGS2 | PTGS2 | Definite | PTGS2 | SULFASALAZINE | inhibitor | TdgClinicalTrial ChEMBLinteractions                   | 16855178 12463455 14742690 12208114 925616510393680 157927                                        |
| PTGS2 | PTGS2 | Definite | PTGS2 | MEFENAMICACID | inhibitor | ChEMBLinteractions                                    | 81 9626023 17150210 7832763 11752352                                                              |
| PTGS2 | PTGS2 | Definite | PTGS2 | POLMICOXIB    | inhibitor | TdgClinicalTrial ChEMBLinteractions TTD               | 11563332 16245223 9152412 11752352 15943176 157569319711054                                       |
| PTGS2 | PTGS2 | Definite | PTGS2 | TENOXICAM     | inhibitor | TdgClinicalTrial TEND TTD                             | 10452868 16808554 1290103217604186 17612049 17607546 11752352 17521299 17532719 19602986 30247840 |
| PTGS2 | PTGS2 | Definite | PTGS2 | SALSALATE     | inhibitor | TdgClinicalTrial TEND                                 | 10452868 16808554 1290103217604186 17612049 17607546 11752352 17521299 17532719 19602986 30247840 |
| PTGS2 | PTGS2 | Definite | PTGS2 | NAPROXEN      | inhibitor | TdgClinicalTrial ChEMBLinteractions TEND PharmGKB TTD | 10452868 16808554 1290103217604186 17612049 17607546 11752352 17521299 17532719 19602986 30247840 |
| PTGS2 | PTGS2 | Definite | PTGS2 | APRICOXIB     | inhibitor | TALC TdgClinic                                        |                                                                                                   |

|       |       |          |       |                         |           |                                                  |                                                                                                                                                                                                                                     |
|-------|-------|----------|-------|-------------------------|-----------|--------------------------------------------------|-------------------------------------------------------------------------------------------------------------------------------------------------------------------------------------------------------------------------------------|
|       |       |          |       |                         |           | alTrial ChemblInteractions                       |                                                                                                                                                                                                                                     |
| PTGS2 | PTGS2 | Definite | PTGS2 | SULINDAC                | inhibitor | TdgClinicalTrial ChemblInteractions TEND         | 1111804<br>2 103728<br>26 10657<br>949 1048<br>5483 110<br>78056                                                                                                                                                                    |
| PTGS2 | PTGS2 | Definite | PTGS2 | DICLOFENAC<br>POTASSIUM | inhibitor | ChemblInteractions                               |                                                                                                                                                                                                                                     |
| PTGS2 | PTGS2 | Definite | PTGS2 | IBUPROFEN<br>SODIUM     | inhibitor | ChemblInteractions                               |                                                                                                                                                                                                                                     |
| PTGS2 | PTGS2 | Definite | PTGS2 | PHENYLBUTAZONE          | inhibitor | TdgClinicalTrial ChemblInteractions TEND TTD     | 1593962<br>2 154898<br>88 12213<br>119 1175<br>2352                                                                                                                                                                                 |
| PTGS2 | PTGS2 | Definite | PTGS2 | BALSALAZIDE             | inhibitor | TdgClinicalTrial                                 | 1798126<br>2 129504<br>15 17139<br>284 1701<br>6423 197<br>43890<br>1058045<br>8 113989<br>14 10566<br>562 1055<br>5907 106<br>43177 10<br>693877 2<br>0724158 <br>1175235<br>2 189225<br>70 20166<br>930 1667<br>8543 196<br>02986 |
| PTGS2 | PTGS2 | Definite | PTGS2 | ROFECOXIB               | inhibitor | TdgClinicalTrial ChemblInteractions PharmGKB TTD |                                                                                                                                                                                                                                     |

|       |       |          |       |                               |            |                                                                          |                                                                                                                                                                             |
|-------|-------|----------|-------|-------------------------------|------------|--------------------------------------------------------------------------|-----------------------------------------------------------------------------------------------------------------------------------------------------------------------------|
| PTGS2 | PTGS2 | Definite | PTGS2 | FLURBIPROFEN                  | inhibitor  | DTC Tdg<br>ClinicalT<br>rial Che<br>mbIInter<br>actions T<br>END TT<br>D | 1009167<br>4 109771<br>31 10773<br>011 1100<br>6278 114<br>05284 17<br>562170 1<br>9066416<br>1271089<br>2 154465<br>66 15982<br>930 2150<br>7989 155<br>98423 15<br>892618 |
| PTGS2 | PTGS2 | Definite | PTGS2 | THALIDOMIDE                   | antagonist | TdgClini<br>calTrial                                                     |                                                                                                                                                                             |
| PTGS2 | PTGS2 | Definite | PTGS2 | BALSALAZIDE<br>DISODIUM       | inhibitor  | ChemblI<br>nteractio<br>ns                                               |                                                                                                                                                                             |
| PTGS2 | PTGS2 | Definite | PTGS2 | AMINO<br>SALICYLATE<br>SODIUM | inhibitor  | ChemblI<br>nteractio<br>ns                                               |                                                                                                                                                                             |
| PTGS2 | PTGS2 | Definite | PTGS2 | DEXIBUPROFEN                  | inhibitor  | DTC                                                                      | 2014377<br>9 280098<br>27                                                                                                                                                   |
| PTGS2 | PTGS2 | Definite | PTGS2 | CYCLOSPORINE                  |            | NCI                                                                      | 1099993<br>9                                                                                                                                                                |
| PTGS2 | PTGS2 | Definite | PTGS2 | RWJ-67657                     |            | TTD                                                                      |                                                                                                                                                                             |
| PTGS2 | PTGS2 | Definite | PTGS2 | HYDROXYCHLOROQUINE            |            | NCI                                                                      | 1496369<br>5                                                                                                                                                                |
| PTGS2 | PTGS2 | Definite | PTGS2 | URSOLIC ACID                  |            | DTC                                                                      | 9784154                                                                                                                                                                     |
| PTGS2 | PTGS2 | Definite | PTGS2 | IMRECOXIB                     |            | TTD                                                                      |                                                                                                                                                                             |
| PTGS2 | PTGS2 | Definite | PTGS2 | (R)-IBUPROPHEN                |            | DTC                                                                      | 2014377<br>9                                                                                                                                                                |

|       |       |              |       |                              |                              |              |
|-------|-------|--------------|-------|------------------------------|------------------------------|--------------|
| PTGS2 | PTGS2 | Definite     | PTGS2 | CIMICO<br>XIB                | TdgClini<br>calTrial <br>TTD | 1548199<br>3 |
| PTGS2 | PTGS2 | Definite     | PTGS2 | RALOXI<br>FENE               | NCI                          | 1524328<br>1 |
| PTGS2 | PTGS2 | Definite     | PTGS2 | CURCU<br>MIN                 | DTC TT<br>D                  | 2492038<br>1 |
| PTGS2 | PTGS2 | Definite     | PTGS2 | CAPECI<br>TABINE             | PharmG<br>KB                 | 1921960<br>2 |
| PTGS2 | PTGS2 | Definite     | PTGS2 | LICOFE<br>LONE               | TdgClini<br>calTrial         | 1701564<br>0 |
| PTGS2 | PTGS2 | Definite     | PTGS2 | ATENO<br>LOL                 | PharmG<br>KB                 |              |
| PTGS2 | PTGS2 | Definite     | PTGS2 | DERSA<br>LAZINE              | TdgClini<br>calTrial         |              |
| PTGS2 | PTGS2 | Definite     | PTGS2 | RESERP<br>INE                | NCI                          | 1608106<br>3 |
| PTGS2 | PTGS2 | Definit<br>e | PTGS2 | CHEMB<br>L217111<br>7        | DTC                          | 2282290<br>8 |
| PTGS2 | PTGS2 | Definit<br>e | PTGS2 | FENBU<br>FEN                 | TTD                          |              |
| PTGS2 | PTGS2 | Definit<br>e | PTGS2 | OXALIP<br>LATIN              | PharmG<br>KB                 | 1921960<br>2 |
| PTGS2 | PTGS2 | Definit<br>e | PTGS2 | DARBU<br>FELON<br>E          | TTD                          |              |
| PTGS2 | PTGS2 | Definit<br>e | PTGS2 | VB-201                       | TdgClini<br>calTrial         |              |
| PTGS2 | PTGS2 | Definit<br>e | PTGS2 | E163                         | DTC                          | 1007576<br>3 |
| PTGS2 | PTGS2 | Definit<br>e | PTGS2 | CURCU<br>MIN<br>PYRAZ<br>OLE | DTC                          | 2492038<br>1 |
| FOS   | FOS   | Definit<br>e | FOS   | DAIDZE<br>IN                 | NCI                          | 8593857      |
| FOS   | FOS   | Definit<br>e | FOS   | PHENO<br>BARBIT<br>AL        | NCI                          | 9187311      |
| FOS   | FOS   | Definit<br>e | FOS   | THROM<br>BIN                 | NCI                          | 2119237      |
| FOS   | FOS   | Definit<br>e | FOS   | NIMODI<br>PINE               | NCI                          | 8301097      |

|        |        |          |        |                        |     |                |
|--------|--------|----------|--------|------------------------|-----|----------------|
| FOS    | FOS    | Definite | FOS    | ANTIBIOTIC             | NCI | 15773551       |
| FOS    | FOS    | Definite | FOS    | ALCOHOL                | NCI | 16750178       |
| FOS    | FOS    | Definite | FOS    | PACLITAXEL             | NCI | 9588740        |
| FOS    | FOS    | Definite | FOS    | PILOCARPINE            | NCI | 9661997        |
| FOS    | FOS    | Definite | FOS    | BACLOFEN               | NCI | 11301212       |
| FOS    | FOS    | Definite | FOS    | BROMOCRIPTINE          | NCI | 11680511       |
| EGR1   | EGR1   | Definite | EGR1   | GENIPIRIN              | DTC | 26283511       |
| FCGR3B | FCGR3B | Definite | FCGR3B | LACTULOSE              | NCI | 1418064        |
| FCGR3B | FCGR3B | Definite | FCGR3B | SODIUM CHLORIDE        | NCI | 17187818       |
| FCGR3B | FCGR3B | Definite | FCGR3B | PENICILLIN G POTASSIUM | NCI | 17257217       |
| FCGR3B | FCGR3B | Definite | FCGR3B | PREDNISOLONE           | NCI | 17329922       |
| FCGR3B | FCGR3B | Definite | FCGR3B | ALDESLERKIN            | NCI | 25285931827816 |
| FCGR3B | FCGR3B | Definite | FCGR3B | EPOETIN ALFA           | NCI | 1300984        |
| FCGR3B | FCGR3B | Definite | FCGR3B | GELDAMYCIN             | NCI | 7662976        |
| FCGR3B | FCGR3B | Definite | FCGR3B | MAFOSFAMIDE            | NCI | 1515095        |
| FCGR3B | FCGR3B | Definite | FCGR3B | PROGESTERONE           | NCI | 16635211       |
| FCGR3B | FCGR3B | Definite | FCGR3B | METHOTREXATE           | NCI | 9811059        |

|            |            |          |        |                         |                |                                                         |              |
|------------|------------|----------|--------|-------------------------|----------------|---------------------------------------------------------|--------------|
| FCGR3<br>B | FCGR3<br>B | Definite | FCGR3B | CYCLO<br>SPORIN<br>E    |                | NCI                                                     | 1785245<br>3 |
| FCGR3<br>B | FCGR3<br>B | Definite | FCGR3B | DOXOR<br>UBICIN         |                | NCI                                                     | 1830717      |
| FCGR3<br>B | FCGR3<br>B | Definite | FCGR3B | METHI<br>MAZOL<br>E     |                | NCI                                                     | 1276136<br>0 |
| FCGR3<br>B | FCGR3<br>B | Definite | FCGR3B | FENTA<br>NYL            |                | NCI                                                     | 1177280<br>8 |
| FCGR3<br>B | FCGR3<br>B | Definite | FCGR3B | INDOM<br>ETHACI<br>N    |                | NCI                                                     | 1732992<br>2 |
| FCGR3<br>B | FCGR3<br>B | Definite | FCGR3B | CHOLE<br>CALCIF<br>EROL |                | NCI                                                     | 9811059      |
| FCGR3<br>B | FCGR3<br>B | Definite | FCGR3B | THALID<br>OMIDE         |                | NCI                                                     | 1545713<br>3 |
| FCGR3<br>B | FCGR3<br>B | Definite | FCGR3B | HEPARI<br>N             |                | NCI                                                     | 1849225<br>4 |
| FCGR3<br>B | FCGR3<br>B | Definite | FCGR3B | PUROM<br>YCIN           |                | NCI                                                     | 8423352      |
| CCR1       | CCR1       | Definite | CCR1   | AZD481<br>8             | antagoni<br>st | ChembII<br>nteractio<br>ns                              |              |
| CCR1       | CCR1       | Definite | CCR1   | BMS-<br>817399          | antagoni<br>st | TTD                                                     |              |
| CCR1       | CCR1       | Definite | CCR1   | CCX354                  | antagoni<br>st | TdgClini<br>calTrial <br>ChembII<br>nteractio<br>ns TTD |              |
| CCR1       | CCR1       | Definite | CCR1   | TERPY<br>RIDINE         |                | DTC                                                     | 2295789<br>0 |
| CCR1       | CCR1       | Definite | CCR1   | CHEMB<br>L220580<br>5   |                | DTC                                                     | 2295789<br>0 |
| FPR1       | FPR1       | Definite | FPR1   | CHEMB<br>L129025<br>1   | agonist        | DTC                                                     | 2087031<br>3 |
| FPR1       | FPR1       | Definite | FPR1   | CHEMB<br>L129036<br>5   |                | DTC                                                     | 2087031<br>3 |



|      |      |          |      |                                 |     |
|------|------|----------|------|---------------------------------|-----|
| FPR1 | FPR1 | Definite | FPR1 | SULFIN<br>PYRAZ<br>ONE<br>PHENY | DTC |
| FPR1 | FPR1 | Definite | FPR1 | LBUTA<br>ZONE<br>REBAM          | DTC |
| FPR1 | FPR1 | Definite | FPR1 | IPIDE<br>PENICI                 | TTD |
| FPR1 | FPR1 | Definite | FPR1 | LLIN G<br>POTASS<br>IUM         | DTC |

---

**sTable 2: The pairs of mRNA-miRNA relationships**

| Gene   | miRNA           | miRanda | miRDB | TargetScan | Sum |
|--------|-----------------|---------|-------|------------|-----|
| PTGS2  | hsa-miR-3120-3p | 1       | 1     | 1          | 3   |
| EGR1   | hsa-miR-3185    | 1       | 1     | 1          | 3   |
| EGR1   | hsa-miR-1911-5p | 1       | 1     | 1          | 3   |
| FCGR3B | hsa-miR-890     | 1       | 1     | 1          | 3   |
| PTGS2  | hsa-miR-302a-5p | 1       | 1     | 1          | 3   |
| FOS    | hsa-miR-3065-3p | 1       | 1     | 1          | 3   |
| FOS    | hsa-miR-3140-3p | 1       | 1     | 1          | 3   |
| FCGR3B | hsa-miR-330-5p  | 1       | 1     | 1          | 3   |
| FOS    | hsa-miR-634     | 1       | 1     | 1          | 3   |
| CXCL1  | hsa-miR-944     | 1       | 1     | 1          | 3   |
| FOS    | hsa-miR-3183    | 1       | 1     | 1          | 3   |
| PTGS2  | hsa-miR-3121-3p | 1       | 1     | 1          | 3   |
| FOS    | hsa-miR-603     | 1       | 1     | 1          | 3   |
| PTGS2  | hsa-miR-1200    | 1       | 1     | 1          | 3   |
| FCGR3B | hsa-miR-519e-5p | 1       | 1     | 1          | 3   |
| EGR1   | hsa-miR-936     | 1       | 1     | 1          | 3   |
| FOS    | hsa-miR-155-5p  | 1       | 1     | 1          | 3   |
| PTGS2  | hsa-miR-542-3p  | 1       | 1     | 1          | 3   |
| FOS    | hsa-miR-181a-5p | 1       | 1     | 1          | 3   |
| EGR1   | hsa-miR-16-1-3p | 1       | 1     | 1          | 3   |
| FCGR3B | hsa-miR-149-5p  | 1       | 1     | 1          | 3   |
| PTGS2  | hsa-miR-3180-5p | 1       | 1     | 1          | 3   |
| CCR1   | hsa-miR-518c-5p | 1       | 1     | 1          | 3   |
| CCR1   | hsa-miR-1261    | 1       | 1     | 1          | 3   |
| FOS    | hsa-miR-1207-3p | 1       | 1     | 1          | 3   |
| CCR1   | hsa-miR-629-5p  | 1       | 1     | 1          | 3   |
| FOS    | hsa-miR-548a-3p | 1       | 1     | 1          | 3   |
| FCGR3B | hsa-miR-571     | 1       | 1     | 1          | 3   |
| PTGS2  | hsa-miR-3065-5p | 1       | 1     | 1          | 3   |
| FOS    | hsa-miR-335-3p  | 1       | 1     | 1          | 3   |
| FCGR3B | hsa-miR-3149    | 1       | 1     | 1          | 3   |
| FOS    | hsa-miR-3148    | 1       | 1     | 1          | 3   |
| FCGR3B | hsa-miR-515-5p  | 1       | 1     | 1          | 3   |
| FOS    | hsa-miR-576-3p  | 1       | 1     | 1          | 3   |
| FCGR3B | hsa-miR-326     | 1       | 1     | 1          | 3   |
| CXCL1  | hsa-miR-302c-5p | 1       | 1     | 1          | 3   |
| FOS    | hsa-miR-502-3p  | 1       | 1     | 1          | 3   |
| CCR1   | hsa-miR-330-5p  | 1       | 1     | 1          | 3   |
| EGR1   | hsa-miR-2110    | 1       | 1     | 1          | 3   |
| FCGR3B | hsa-miR-7-5p    | 1       | 1     | 1          | 3   |
| PTGS2  | hsa-miR-543     | 1       | 1     | 1          | 3   |

|        |                   |   |   |   |   |
|--------|-------------------|---|---|---|---|
| PTGS2  | hsa-miR-641       | 1 | 1 | 1 | 3 |
| PTGS2  | hsa-miR-101-5p    | 1 | 1 | 1 | 3 |
| FOS    | hsa-miR-4251      | 1 | 1 | 1 | 3 |
| EGR1   | hsa-miR-191-5p    | 1 | 1 | 1 | 3 |
| EGR1   | hsa-miR-212-3p    | 1 | 1 | 1 | 3 |
| CXCL1  | hsa-miR-337-3p    | 1 | 1 | 1 | 3 |
| EGR1   | hsa-miR-23a-3p    | 1 | 1 | 1 | 3 |
| PTGS2  | hsa-miR-508-3p    | 1 | 1 | 1 | 3 |
| PTGS2  | hsa-miR-3182      | 1 | 1 | 1 | 3 |
| PTGS2  | hsa-miR-548x-3p   | 1 | 1 | 1 | 3 |
| FOS    | hsa-miR-3163      | 1 | 1 | 1 | 3 |
| CXCL1  | hsa-miR-449c-5p   | 1 | 1 | 1 | 3 |
| FOS    | hsa-miR-543       | 1 | 1 | 1 | 3 |
| FOS    | hsa-miR-490-5p    | 1 | 1 | 1 | 3 |
| CXCL1  | hsa-miR-551b-5p   | 1 | 1 | 1 | 3 |
| CCR1   | hsa-miR-495-3p    | 1 | 1 | 1 | 3 |
| EGR1   | hsa-miR-581       | 1 | 1 | 1 | 3 |
| FOS    | hsa-miR-424-3p    | 1 | 1 | 1 | 3 |
| PTGS2  | hsa-miR-125b-2-3p | 1 | 1 | 1 | 3 |
| PTGS2  | hsa-miR-26b-5p    | 1 | 1 | 1 | 3 |
| CCR1   | hsa-miR-516a-3p   | 1 | 1 | 1 | 3 |
| CXCL1  | hsa-miR-1323      | 1 | 1 | 1 | 3 |
| PTGS2  | hsa-miR-4291      | 1 | 1 | 1 | 3 |
| FOS    | hsa-miR-221-3p    | 1 | 1 | 1 | 3 |
| PTGS2  | hsa-miR-513a-3p   | 1 | 1 | 1 | 3 |
| FOS    | hsa-miR-29c-3p    | 1 | 1 | 1 | 3 |
| FCGR3B | hsa-miR-556-3p    | 1 | 1 | 1 | 3 |
| FCGR3B | hsa-miR-3185      | 1 | 1 | 1 | 3 |
| PTGS2  | hsa-miR-802       | 1 | 1 | 1 | 3 |
| EGR1   | hsa-miR-132-3p    | 1 | 1 | 1 | 3 |
| PTGS2  | hsa-miR-607       | 1 | 1 | 1 | 3 |
| FOS    | hsa-miR-548d-3p   | 1 | 1 | 1 | 3 |
| EGR1   | hsa-miR-4251      | 1 | 1 | 1 | 3 |
| FCGR3B | hsa-miR-136-5p    | 1 | 1 | 1 | 3 |
| CXCL1  | hsa-miR-935       | 1 | 1 | 1 | 3 |
| CXCL1  | hsa-miR-532-5p    | 1 | 1 | 1 | 3 |
| FCGR3B | hsa-let-7b-3p     | 1 | 1 | 1 | 3 |
| PTGS2  | hsa-miR-1297      | 1 | 1 | 1 | 3 |
| PTGS2  | hsa-miR-4282      | 1 | 1 | 1 | 3 |
| EGR1   | hsa-miR-524-5p    | 1 | 1 | 1 | 3 |
| FOS    | hsa-miR-101-3p    | 1 | 1 | 1 | 3 |
| EGR1   | hsa-miR-4271      | 1 | 1 | 1 | 3 |
| FCGR3B | hsa-miR-92a-1-5p  | 1 | 1 | 1 | 3 |
| FCGR3B | hsa-miR-297       | 1 | 1 | 1 | 3 |

|        |                 |   |   |   |   |
|--------|-----------------|---|---|---|---|
| PTGS2  | hsa-miR-374b-5p | 1 | 1 | 1 | 3 |
| FCGR3B | hsa-miR-567     | 1 | 1 | 1 | 3 |
| FOS    | hsa-miR-144-3p  | 1 | 1 | 1 | 3 |
| EGR1   | hsa-miR-377-3p  | 1 | 1 | 1 | 3 |
| EGR1   | hsa-miR-204-5p  | 1 | 1 | 1 | 3 |
| FOS    | hsa-miR-545-5p  | 1 | 1 | 1 | 3 |
| EGR1   | hsa-miR-4269    | 1 | 1 | 1 | 3 |
| FOS    | hsa-miR-873-5p  | 1 | 1 | 1 | 3 |
| MMP9   | hsa-miR-3123    | 1 | 1 | 1 | 3 |
| PTGS2  | hsa-miR-4251    | 1 | 1 | 1 | 3 |
| CCR1   | hsa-miR-193b-5p | 1 | 1 | 1 | 3 |
| FOS    | hsa-miR-29a-3p  | 1 | 1 | 1 | 3 |
| CCR1   | hsa-miR-326     | 1 | 1 | 1 | 3 |
| PTGS2  | hsa-miR-628-5p  | 1 | 1 | 1 | 3 |
| EGR1   | hsa-miR-1264    | 1 | 1 | 1 | 3 |
| EGR1   | hsa-miR-600     | 1 | 1 | 1 | 3 |
| FOS    | hsa-miR-2053    | 1 | 1 | 1 | 3 |
| CXCL1  | hsa-miR-3121-3p | 1 | 1 | 1 | 3 |
| PTGS2  | hsa-miR-944     | 1 | 1 | 1 | 3 |
| PTGS2  | hsa-miR-26a-5p  | 1 | 1 | 1 | 3 |
| EGR1   | hsa-miR-369-3p  | 1 | 1 | 1 | 3 |
| PTGS2  | hsa-miR-758-3p  | 1 | 1 | 1 | 3 |
| EGR1   | hsa-miR-30d-3p  | 1 | 1 | 1 | 3 |
| FCGR3B | hsa-miR-525-5p  | 1 | 1 | 1 | 3 |
| CXCL1  | hsa-miR-3182    | 1 | 1 | 1 | 3 |
| PTGS2  | hsa-miR-545-3p  | 1 | 1 | 1 | 3 |
| FOS    | hsa-miR-501-3p  | 1 | 1 | 1 | 3 |
| CXCL1  | hsa-miR-3187-3p | 1 | 1 | 1 | 3 |
| FOS    | hsa-miR-4279    | 1 | 1 | 1 | 3 |
| CXCL1  | hsa-miR-570-3p  | 1 | 1 | 1 | 3 |
| PTGS2  | hsa-miR-183-5p  | 1 | 1 | 1 | 3 |
| FOS    | hsa-miR-4267    | 1 | 1 | 1 | 3 |
| FOS    | hsa-miR-1253    | 1 | 1 | 1 | 3 |
| FOS    | hsa-miR-181c-5p | 1 | 1 | 1 | 3 |
| CXCL1  | hsa-miR-561-3p  | 1 | 1 | 1 | 3 |
| PTGS2  | hsa-miR-633     | 1 | 1 | 1 | 3 |
| FOS    | hsa-miR-569     | 1 | 1 | 1 | 3 |
| FCGR3B | hsa-let-7a-3p   | 1 | 1 | 1 | 3 |
| EGR1   | hsa-miR-506-3p  | 1 | 1 | 1 | 3 |
| CCR1   | hsa-miR-3154    | 1 | 1 | 1 | 3 |
| PTGS2  | hsa-miR-544b    | 1 | 1 | 1 | 3 |
| EGR1   | hsa-miR-760     | 1 | 1 | 1 | 3 |
| PTGS2  | hsa-miR-3163    | 1 | 1 | 1 | 3 |
| PTGS2  | hsa-miR-4274    | 1 | 1 | 1 | 3 |

|        |                   |   |   |   |   |
|--------|-------------------|---|---|---|---|
| FOS    | hsa-miR-548x-3p   | 1 | 1 | 1 | 3 |
| CXCL1  | hsa-miR-2116-5p   | 1 | 1 | 1 | 3 |
| PTGS2  | hsa-miR-548g-3p   | 1 | 1 | 1 | 3 |
| EGR1   | hsa-miR-211-5p    | 1 | 1 | 1 | 3 |
| FOS    | hsa-miR-1244      | 1 | 1 | 1 | 3 |
| FOS    | hsa-miR-222-3p    | 1 | 1 | 1 | 3 |
| CXCL1  | hsa-miR-373-3p    | 1 | 1 | 1 | 3 |
| FCGR3B | hsa-miR-3168      | 1 | 1 | 1 | 3 |
| FCGR3B | hsa-let-7f-1-3p   | 1 | 1 | 1 | 3 |
| EGR1   | hsa-miR-23b-3p    | 1 | 1 | 1 | 3 |
| FOS    | hsa-miR-338-3p    | 1 | 1 | 1 | 3 |
| PTGS2  | hsa-miR-300       | 1 | 1 | 1 | 3 |
| PTGS2  | hsa-miR-132-3p    | 1 | 1 | 1 | 3 |
| EGR1   | hsa-miR-3121-3p   | 1 | 1 | 1 | 3 |
| FOS    | hsa-miR-29b-3p    | 1 | 1 | 1 | 3 |
| CCR1   | hsa-miR-149-3p    | 1 | 1 | 1 | 3 |
| FPR1   | hsa-miR-4300      | 1 | 1 | 1 | 3 |
| MMP9   | hsa-miR-3065-5p   | 1 | 1 | 1 | 3 |
| PTGS2  | hsa-miR-29b-1-5p  | 1 | 1 | 1 | 3 |
| PTGS2  | hsa-miR-381-3p    | 1 | 1 | 1 | 3 |
| PTGS2  | hsa-miR-1827      | 1 | 1 | 1 | 3 |
| PTGS2  | hsa-miR-101-3p    | 1 | 1 | 1 | 3 |
| PTGS2  | hsa-miR-3145-3p   | 1 | 1 | 1 | 3 |
| PTGS2  | hsa-miR-4324      | 1 | 1 | 1 | 3 |
| PTGS2  | hsa-miR-126-5p    | 1 | 1 | 1 | 3 |
| FCGR3B | hsa-miR-148b-5p   | 1 | 1 | 1 | 3 |
| FOS    | hsa-miR-139-5p    | 1 | 1 | 1 | 3 |
| FOS    | hsa-miR-181b-5p   | 1 | 1 | 1 | 3 |
| EGR1   | hsa-miR-125b-2-3p | 1 | 1 | 1 | 3 |
| PTGS2  | hsa-miR-548c-3p   | 1 | 1 | 1 | 3 |
| PTGS2  | hsa-miR-212-3p    | 1 | 1 | 1 | 3 |
| MMP9   | hsa-miR-149-5p    | 1 | 1 | 1 | 3 |
| EGR1   | hsa-miR-3119      | 1 | 1 | 1 | 3 |
| CCR1   | hsa-miR-126-5p    | 1 | 1 | 1 | 3 |
| PTGS2  | hsa-miR-548p      | 1 | 1 | 1 | 3 |

---

**sTable 3: The pairs of miRNA-lncRNA relationships**

| miRNA             | lncRNA          |
|-------------------|-----------------|
| hsa-miR-7-5p      | CDR1-AS         |
| hsa-miR-802       | CTA-414D7.1     |
| hsa-miR-1200      | LINC01043       |
| hsa-miR-570-3p    | RP11-10J21.4    |
| hsa-miR-1207-3p   | MUC19           |
| hsa-miR-7-5p      | RP11-830F9.6    |
| hsa-miR-92a-1-5p  | MUC2            |
| hsa-miR-326       | RP1-34P24.3     |
| hsa-miR-515-5p    | TLL10-AS1       |
| hsa-miR-149-3p    | C10orf91        |
| hsa-miR-449c-5p   | AC079779.7      |
| hsa-miR-136-5p    | CTD-2534I21.9   |
| hsa-miR-149-5p    | LINC01043       |
| hsa-miR-515-5p    | AC079779.7      |
| hsa-miR-545-3p    | LINC01070       |
| hsa-miR-449c-5p   | RP11-138B4.1    |
| hsa-miR-7-5p      | FLJ35934        |
| hsa-miR-377-3p    | LL22NC03-27C5.1 |
| hsa-miR-873-5p    | RP5-894D12.5    |
| hsa-let-7a-3p     | RP3-323A16.1    |
| hsa-miR-193b-5p   | MUC2            |
| hsa-miR-338-3p    | RP11-229P13.22  |
| hsa-miR-1207-3p   | RP11-326C3.10   |
| hsa-miR-873-5p    | RP11-102K13.5   |
| hsa-miR-1207-3p   | RP11-326C3.14   |
| hsa-let-7a-3p     | DPP10-AS2       |
| hsa-miR-125b-2-3p | RP11-333E1.2    |
| hsa-miR-377-3p    | RP4-737E23.2    |
| hsa-miR-1207-3p   | TP73-AS1        |
| hsa-miR-101-3p    | AC091153.4      |
| hsa-miR-338-3p    | RP4-539M6.22    |
| hsa-miR-449c-5p   | RP11-458F8.4    |
| hsa-miR-515-5p    | RP13-507P19.2   |
| hsa-miR-136-5p    | RP11-526P6.1    |
| hsa-miR-543       | RP11-429B14.4   |
| hsa-miR-532-5p    | RP11-413M3.4    |
| hsa-miR-7-5p      | RP11-338K13.1   |
| hsa-miR-92a-1-5p  | RP11-13K12.1    |
| hsa-miR-7-5p      | RP11-932O9.4    |
| hsa-miR-377-3p    | CTD-3138B18.5   |
| hsa-miR-149-3p    | CTA-941F9.10    |

|                 |                 |
|-----------------|-----------------|
| hsa-miR-149-5p  | RP11-394A14.2   |
| hsa-miR-338-3p  | CTD-2292P10.2   |
| hsa-miR-377-3p  | RP11-210M15.1   |
| hsa-miR-149-3p  | AIRN            |
| hsa-miR-338-3p  | LINC01165       |
| hsa-let-7a-3p   | FAM230B         |
| hsa-miR-335-3p  | SLC8A1-AS1      |
| hsa-miR-377-3p  | LINC01002       |
| hsa-miR-181a-5p | LL22NC03-27C5.1 |
| hsa-miR-515-5p  | RP13-580B18.4   |
| hsa-miR-542-3p  | RP4-671O14.7    |
| hsa-miR-338-3p  | RP11-780K2.1    |
| hsa-miR-7-5p    | AC006019.3      |
| hsa-miR-338-3p  | PCBP3-OT1       |
| hsa-miR-542-3p  | AC079586.1      |
| hsa-miR-545-3p  | LINC01165       |
| hsa-miR-561-3p  | RP11-231G3.1    |
| hsa-miR-149-3p  | LINC00265       |
| hsa-miR-1200    | LINC01123       |
| hsa-miR-149-3p  | RP11-311F12.1   |
| hsa-miR-542-3p  | RP11-157B13.7   |
| hsa-miR-149-3p  | LINC00689       |
| hsa-miR-16-1-3p | CTD-3099C6.5    |
| hsa-miR-873-5p  | RP4-539M6.22    |
| hsa-miR-515-5p  | SPACA6P         |
| hsa-miR-515-5p  | AC093642.4      |
| hsa-miR-126-5p  | RP11-164O23.8   |
| hsa-miR-297     | CTA-929C8.6     |
| hsa-miR-542-3p  | LINC00917       |
| hsa-miR-1200    | CTD-2008P7.3    |
| hsa-miR-338-3p  | MCF2L-AS1       |
| hsa-miR-338-3p  | LINC01423       |
| hsa-miR-1200    | RP11-22M7.2     |
| hsa-miR-515-5p  | FAM74A1         |
| hsa-miR-326     | RP11-413M3.4    |
| hsa-miR-873-5p  | RP11-333E1.2    |
| hsa-miR-1207-3p | CTD-2006K23.1   |
| hsa-miR-302a-5p | RP11-343D2.11   |
| hsa-miR-1200    | RP11-627G23.1   |
| hsa-miR-149-3p  | CTA-315H11.2    |
| hsa-miR-501-3p  | LINC01165       |
| hsa-miR-149-3p  | RP11-153F5.7    |
| hsa-miR-149-3p  | LINC00173       |
| hsa-miR-758-3p  | AC079586.1      |

|                 |                |
|-----------------|----------------|
| hsa-miR-139-5p  | AC015849.16    |
| hsa-miR-1207-3p | KCNQ1OT1       |
| hsa-miR-149-3p  | TMEM191A       |
| hsa-miR-1207-3p | LINC00588      |
| hsa-miR-338-3p  | AC015849.16    |
| hsa-miR-16-1-3p | RP11-50B3.4    |
| hsa-miR-149-3p  | RP11-186N15.3  |
| hsa-miR-515-5p  | LINC01002      |
| hsa-miR-501-3p  | AC141928.1     |
| hsa-miR-7-5p    | RP11-394A14.2  |
| hsa-miR-1200    | RP11-1129I3.1  |
| hsa-miR-542-3p  | LINC01224      |
| hsa-miR-335-3p  | CTA-392E5.1    |
| hsa-miR-338-3p  | SNHG14         |
| hsa-miR-628-5p  | RP11-311F12.1  |
| hsa-miR-136-5p  | SPACA6P        |
| hsa-miR-543     | AC113607.3     |
| hsa-miR-760     | AC006019.3     |
| hsa-miR-139-5p  | RP11-231D20.2  |
| hsa-miR-513a-3p | RP11-474P2.6   |
| hsa-miR-29a-3p  | RP11-223P11.3  |
| hsa-miR-326     | MIR143HG       |
| hsa-miR-149-3p  | CTD-3193O13.1  |
| hsa-miR-1200    | LINC00689      |
| hsa-miR-758-3p  | LINC01224      |
| hsa-miR-335-3p  | RP11-146D12.2  |
| hsa-miR-335-3p  | RP11-335L23.4  |
| hsa-miR-873-5p  | RP11-96L7.2    |
| hsa-miR-7-5p    | LINC00662      |
| hsa-miR-449c-5p | LINC01070      |
| hsa-miR-760     | RP11-394A14.2  |
| hsa-miR-449c-5p | AC114783.1     |
| hsa-miR-515-5p  | CTD-2197I11.1  |
| hsa-miR-516a-3p | AC137934.1     |
| hsa-miR-515-5p  | RP11-1217F2.15 |
| hsa-miR-149-3p  | MAFG-AS1       |
| hsa-miR-1207-3p | AC005481.5     |
| hsa-miR-873-5p  | RP13-895J2.3   |
| hsa-miR-449c-5p | LINC00265      |
| hsa-miR-149-5p  | CTD-2008P7.3   |
| hsa-miR-338-3p  | CTD-3138B18.5  |
| hsa-miR-449c-5p | LINC01168      |
| hsa-miR-335-3p  | LINC01122      |
| hsa-miR-449c-5p | RP11-338K13.1  |



|                 |                  |
|-----------------|------------------|
| hsa-miR-515-5p  | CTD-3099C6.5     |
| hsa-miR-149-3p  | RP11-148K1.12    |
| hsa-miR-490-5p  | CDR1-AS          |
| hsa-miR-193b-5p | RP11-527L4.2     |
| hsa-miR-338-3p  | GRM7-AS1         |
| hsa-miR-515-5p  | SNHG14           |
| hsa-miR-149-3p  | RP11-430G17.3    |
| hsa-miR-126-5p  | RP11-517O13.1    |
| hsa-miR-149-3p  | RP11-1348G14.8   |
| hsa-miR-335-3p  | RP11-96K19.4     |
| hsa-miR-515-5p  | AC084219.4       |
| hsa-miR-515-5p  | AC015849.16      |
| hsa-miR-501-3p  | RP11-244O19.1    |
| hsa-miR-449c-5p | RP11-66N24.4     |
| hsa-miR-449c-5p | AP001476.4       |
| hsa-miR-149-3p  | PAX8-AS1         |
| hsa-miR-944     | RP5-1077H22.2    |
| hsa-miR-513a-3p | LL22NC03-N64E9.1 |
| hsa-miR-297     | AC084219.4       |
| hsa-let-7a-3p   | LPP-AS2          |
| hsa-miR-515-5p  | FAM74A7          |
| hsa-miR-1207-3p | RP4-751H13.7     |
| hsa-miR-149-3p  | RP11-630C16.2    |
| hsa-miR-758-3p  | RP11-157B13.7    |
| hsa-miR-7-5p    | CTA-243E7.1      |
| hsa-miR-556-3p  | RP11-700J17.1    |
| hsa-miR-513a-3p | AC009299.3       |
| hsa-miR-449c-5p | RP4-539M6.22     |
| hsa-miR-758-3p  | RP11-15H20.6     |
| hsa-miR-181a-5p | ZNF833P          |
| hsa-miR-149-3p  | CTD-2369P2.8     |

---
